# Supplementary material for: Control of heterochromatin localization and silencing by the nuclear membrane protein Lem2
Source: PubMed Central journal article supplement — Genes Dev. 2016 Jan 15;30(2):133–48. doi: 10.1101/gad.271288.115 (PMC4719305; doi:10.1101/gad.271288.115), 2016-01-15
Supplement: supp_gad.271288.115_SuppTables1-4.pdf [file supp_gad.271288.115_SuppTables1-4.pdf]

**Table S1: Strains used in this study**

| Strain  | Genotype                                                                                                                                             | Source | Figure                                    |
|---------|------------------------------------------------------------------------------------------------------------------------------------------------------|--------|-------------------------------------------|
| FY1193  | <i>P (h+) leu1-32 ade6-210 ura4-DS/E imr1L(NcoI)::ura4+ otr1R(SphI)::ade6+</i>                                                                       | 2      | 1C 3 5C 7BCD<br>S1DE S4 S5 S6<br>S8BC S10 |
| PSB0906 | <i>P (h+) leu1-32 ade6-210 ura4-DS/E imr1L(NcoI)::ura4+ otr1R(SphI)::ade6+ cen1:hphMX lem2::natMX</i>                                                | 1      | 1C 3 7BCD S1DE<br>S4 S5BCD S6AB<br>S10    |
| PM0335  | <i>P (h+) leu1-32 ade6-210 ura4-DS/E imr1L(NcoI)::ura4+ otr1R(SphI)::ade6+ clr4::kanMX</i>                                                           | 3      | 1BC 3AB S1C<br>S5BC                       |
| SPY139  | <i>h90 mat3M::ura4 leu1-32 ade6-M210 ura4DS/E</i>                                                                                                    | 4      | 1C                                        |
| PM0333  | <i>h90 mat3M::ura4 leu1-32 ade6-M210 ura4DS/E clr4::kanMX</i>                                                                                        | 3      | 1C                                        |
| PSB0706 | <i>h90 mat3M::ura4 leu1-32 ade6-M210 ura4DS/E lem2::natMX</i>                                                                                        | 1      | 1C                                        |
| PSB0582 | <i>P (h-) leu1-32 ade6-210 ura4-D18 imr1L(NcoI)::ura4+ otr1R(SphI)::ade6+ mat1_m-cyhS smt0 rpl42::cyhR(sP56Q) cen1:hphMX</i>                         | 1      | 1BDE 2 S1C S2 S3                          |
| PSB0638 | <i>P (h-) leu1-32 ade6-210 ura4-D18 imr1L(NcoI)::ura4+ otr1R(SphI)::ade6+ mat1_m-cyhS smt0 rpl42::cyhR(sP56Q) cen1:hphMX lem2::natMX</i>             | 1      | 1BDE 2 S1C S2 S3                          |
| PSB0646 | <i>P (h-) leu1-32 ade6-210 ura4-D18 imr1L(NcoI)::ura4+ otr1R(SphI)::ade6+ mat1_m-cyhS smt0 rpl42::cyhR(sP56Q) cen1:hphMX nur1::natMX</i>             | 1      | 2 S2AB S3B                                |
| PSB0809 | <i>P (h+) leu1-32 ade6-210 ura4-D18 imr1L(NcoI)::ura4+ otr1R(SphI)::ade6+ rpl42::cyhR(sP56Q) cen1:hphMX nur1::kanMX lem2::natMX</i>                  | 1      | S2AB                                      |
| PSB0640 | <i>P (h-) leu1-32 ade6-210 ura4-D18 imr1L(NcoI)::ura4+ otr1R(SphI)::ade6+ mat1_m-cyhS smt0 rpl42::cyhR(sP56Q) cen1:hphMX ima1::natMX</i>             | 1      | 1DE S2C                                   |
| PSB1332 | <i>P (h-) leu1-32 ade6-210 ura4-D18 imr1L(NcoI)::ura4+ otr1R(SphI)::ade6+ mat1_m-cyhS smt0 rpl42::cyhR(sP56Q) cen1:hphMX ima1::natMX lem2::kanMX</i> | 1      | 1DE S2C                                   |

Table S1: Strains used in this study (cont.)

|         |                                                                                                                                                      |   |                |
|---------|------------------------------------------------------------------------------------------------------------------------------------------------------|---|----------------|
| PSB0642 | <i>P (h-) leu1-32 ade6-210 ura4-D18 imr1L(NcoI)::ura4+ otr1R(SphI)::ade6+ mat1_m-cyhS smt0 rpl42::cyhR(sP56Q) cen1:hphMX man1::natMX</i>             | 1 | 1DE S2C        |
| PSB1328 | <i>P (h-) leu1-32 ade6-210 ura4-D18 imr1L(NcoI)::ura4+ otr1R(SphI)::ade6+ mat1_m-cyhS smt0 rpl42::cyhR(sP56Q) cen1:hphMX man1::natMX lem2::kanMX</i> | 1 | 1DE S2C        |
| PSB0736 | <i>P (h-) leu1-32 ade6-210 ura4-D18 imr1L(NcoI)::ura4+ otr1R(SphI)::ade6+ mat1_m-cyhS smt0 rpl42::cyhR(sP56Q) cen1:hphMX clr2::natMX</i>             | 1 | 2ABD S3B       |
| PSB0734 | <i>P (h-) leu1-32 ade6-210 ura4-D18 imr1L(NcoI)::ura4+ otr1R(SphI)::ade6+ mat1_m-cyhS smt0 rpl42::cyhR(sP56Q) cen1:hphMX ckb1::natMX</i>             | 1 | 2AB S3B        |
| PSB0835 | <i>P (h+) leu1-32 ade6-210 ura4-DS/E imr1L(NcoI)::ura4+ otr1R(SphI)::ade6+ csil::kanMX</i>                                                           | 1 | 3A S4A S6B     |
| PSB0871 | <i>P (h+) leu1-32 ade6-210 ura4-DS/E imr1L(NcoI)::ura4+ otr1R(SphI)::ade6+ lem2::natMX csil::kanMX cen1:hphMX?</i>                                   | 1 | 3A S4A S5D S6B |
| PSB0837 | <i>P (h+) leu1-32 ade6-210 ura4-DS/E imr1L(NcoI)::ura4+ otr1R(SphI)::ade6+ alp14::kanMX</i>                                                          | 1 | S4AB           |
| PSB0872 | <i>P (h+) leu1-32 ade6-210 ura4-DS/E imr1L(NcoI)::ura4+ otr1R(SphI)::ade6+ lem2::natMX alp14::kanMX cen1:hphMX?</i>                                  | 1 | S4AB S5D       |
| PSB0841 | <i>P (h+) leu1-32 ade6-210 ura4-DS/E imr1L(NcoI)::ura4+ otr1R(SphI)::ade6+ lnp1::kanMX</i>                                                           | 1 | S4C            |
| PSB0876 | <i>P (h+) leu1-32 ade6-210 ura4-DS/E imr1L(NcoI)::ura4+ otr1R(SphI)::ade6+ lem2::natMX lnp1::kanMX cen1:hphMX?</i>                                   | 1 | S4C            |
| PSB0843 | <i>P (h+) leu1-32 ade6-210 ura4-DS/E imr1L(NcoI)::ura4+ otr1R(SphI)::ade6+ dsh1::kanMX</i>                                                           | 1 | 3AB S5B        |
| PSB0879 | <i>P (h+) leu1-32 ade6-210 ura4-DS/E imr1L(NcoI)::ura4+ otr1R(SphI)::ade6+ lem2::natMX dsh1::kanMX cen1:hphMX</i>                                    | 1 | 3 S5BD S6C     |
| PSB1134 | <i>P (h+) leu1-32 ade6-210 ura4-DS/E imr1L(NcoI)::ura4+ otr1R(SphI)::ade6+ taz1::hphMX</i>                                                           | 1 | 3B             |

Table S1: Strains used in this study (cont.)

|         |                                                                                                                            |   |            |
|---------|----------------------------------------------------------------------------------------------------------------------------|---|------------|
| PSB1166 | <i>P (h+) leu1-32 ade6-210 ura4-DS/E imr1L(NcoI)::ura4+ otr1R(SphI)::ade6+ lem2::natMX taz1::hphMX</i>                     | 1 | 3B S5B S6C |
| PSB1135 | <i>P (h+) leu1-32 ade6-210 ura4-DS/Eimr1L(NcoI)::ura4+ otr1R(SphI)::ade6+ dsh1::kanMX taz1::hphMX</i>                      | 1 | 3B S5B S6C |
| PSB1168 | <i>P (h+) leu1-32 ade6-210 ura4-DS/E imr1L(NcoI)::ura4+ otr1R(SphI)::ade6+ lem2::natMX dsh1::kanMX taz1::hphMX</i>         | 1 | 3B S5B S6C |
| PSB1054 | <i>P (h+) leu1-32 ade6-210 ura4-DS/Eimr1L(NcoI)::ura4+ otr1R(SphI)::ade6+ atf1::hphMX</i>                                  | 1 | S5C        |
| PSB1152 | <i>P (h+) leu1-32 ade6-210 ura4-DS/E imr1L(NcoI)::ura4+ otr1R(SphI)::ade6+ lem2::natMX atf1::hphMX</i>                     | 1 | S5C        |
| PSB0374 | <i>P (h+) leu1-32 ade6-216 ura4-D18</i>                                                                                    | 5 | S1A        |
| PSB0591 | <i>P (h+) leu1-32 ade6-216 ura4-D18 lem2::natMX</i>                                                                        | 1 | S1A        |
| PSB0595 | <i>P (h+) leu1-32 ade6-216 ura4-D18 nur1::natMX</i>                                                                        | 1 | S1A        |
| PSB0514 | <i>P (h-) leu1-32 ade6-210 ura4-D18 smt0 clr4::kanMX</i>                                                                   | 1 | S1A        |
| PSB0356 | <i>P (h+) leu1-32 ade6-210 ura4-DS/E imr1L(NcoI)::ura4+ otr1R(SphI)::ade6+ chp1:CBP-2xFLAG:kanMX</i>                       | 1 | S5A        |
| PSB1224 | <i>P (h+) leu1-32 ade6-210 ura4-DS/E imr1L(NcoI)::ura4+ otr1R(SphI)::ade6+ chp1:CBP-2xFLAG:kanMX lem2::natMX (clone 1)</i> | 1 | S5A        |
| PSB1225 | <i>P (h+) leu1-32 ade6-210 ura4-DS/E imr1L(NcoI)::ura4+ otr1R(SphI)::ade6+ chp1:CBP-2xFLAG:kanMX lem2::natMX (clone 2)</i> | 1 | S5A        |
| PSB1099 | <i>P (h+) leu1-32 ade6- ura4- his7-366? taz1:GFP:KanMX cut11:mCherry:hphMX</i>                                             | * | 4DE        |
| PSB1149 | <i>P (h+) leu1-32 ade6- ura4- his7-366? taz1:GFP:KanMX cut11:mCherry:hphMX dsh1::natMX</i>                                 | 1 | 4E         |
| PSB1101 | <i>P (h+) leu1-32 ade6- ura4- his7-366? taz1:GFP:KanMX cut11:mCherry:hphMX lem2::natMX</i>                                 | 1 | 4E         |

Table S1: Strains used in this study (cont.)

|         |                                                                                                                |   |           |
|---------|----------------------------------------------------------------------------------------------------------------|---|-----------|
| PSB1151 | <i>P (h+) leu1-32 ade6- ura4- his7-366? taz1::GFP:KanMX cut11::mCherry:hphMX lem2::natMX dsh1::bleMX</i>       | 1 | 4DE       |
| PSB0912 | <i>P (h+) leu1-32 ade6-M210 ura4-D18 his7-366? mis6::GFP:KanMX sad1::mCherry:hphMX</i>                         | 1 | 4ABC S7AB |
| PSB0994 | <i>P (h+) leu1-32 ade6-M210 ura4- his7-366? mis6::GFP:KanMX sad1::mCherry:hphMX lem2::natMX</i>                | 1 | 4ABC S7AB |
| PSB1057 | <i>P (h+) leu1-32 ade6-M210 ura4-D18 his7-366? mis6::GFP:KanMX sad1::mCherry:hphMX csi1::natMX</i>             | 1 | 4ABC S7AB |
| PSB1071 | <i>P (h+) leu1-32ade6-M210ura4- his7-366? mis6::GFP:KanMX sad1::mCherry:hphMX lem2::natMX csi1::bleMX</i>      | 1 | 4ABC S7AB |
| PSB1059 | <i>P (h+) leu1-32 ade6-M210 ura4-D18 his7-366? mis6::GFP:KanMX sad1::mCherry:hphMX dsh1::natMX</i>             | 1 | S7AB      |
| PSB1067 | <i>P (h+) leu1-32 ade6-M210 ura4-D18 his7-366? mis6::GFP:KanMX sad1::mCherry:hphMX lem2::natMX dsh1::bleMX</i> | 1 | S7AB      |
| PSB1097 | <i>P (h+) leu1-32 ade6-M210 ura4-D18 mis6::GFP:KanMX cut11::mCherry:hphMX</i>                                  | 1 | S7C       |
| PSB1651 | <i>P (h+) leu1-32 ade6-M210 ura4-D18 mis6::GFP:KanMX cut11::mCherry:hphMX lem2::natMX</i>                      | 1 | S7C       |
| PSB1653 | <i>P (h+) leu1-32 ade6-M210 ura4-D18 mis6::GFP:KanMX cut11::mCherry:hphMX csi::natMX</i>                       | 1 | S7C       |
| PSB1670 | <i>P (h+) leu1-32 ade6-M210 ura4-D18 mis6::GFP:KanMX cut11::mCherry:hphMX lem2::natMX csi1::bleMX</i>          | 1 | S7C       |
| PSB1478 | <i>P (h+) ade6-210 ura4-D18 his7-366 sad1::mCherry:hphMX lem2::natMX pREP81x</i>                               | 1 | 5B        |
| PSB1087 | <i>P (h+) ade6-210 ura4-D18 his7-366 sad1::mCherry:hphMX lem2::natMX pREP81x_lem2_GFP</i>                      | 1 | 5B        |
| PSB1088 | <i>P (h+) ade6-210 ura4-D18 his7-366 sad1::mCherry:hphMX lem2::natMX pREP81x_lem2ΔN_GFP</i>                    | 1 | 5B        |

Table S1: Strains used in this study (cont.)

|         |                                                                                                                                                                |   |          |
|---------|----------------------------------------------------------------------------------------------------------------------------------------------------------------|---|----------|
| PSB1365 | <i>P (h+) ade6-210 ura4-D18 his7-366 sad1:mCherry:hphMX lem2::natMX pREP81x_lem2ΔC_GFP</i>                                                                     | 1 | 5B       |
| PSB1091 | <i>P (h+) ade6-210 ura4-D18 his7-366 sad1:mCherry:hphMX lem2::natMX pREP81x_lem2 Cterm_GFP</i>                                                                 | 1 | 5B       |
| PSB1090 | <i>P (h+) ade6-210 ura4-D18 his7-366 sad1:mCherry:hphMX lem2::natMX pREP81x_lem2 Nterm_GFP</i>                                                                 | 1 | 5B       |
| PSB1012 | <i>P (h-) leu1-32 ade6-210 ura4-D18 imr1L(NcoI)::ura4+ otr1R(SphI)::ade6+ mat1_m-cyhS smt0 rpl42::cyhR(sP56Q) cen1:hphMX pREP81x_GFP</i>                       | 1 | S8A      |
| PSB1021 | <i>P (h-) leu1-32 ade6-210 ura4-D18 imr1L(NcoI)::ura4+ otr1R(SphI)::ade6+ mat1_m-cyhS smt0 rpl42::cyhR(sP56Q) cen1:hphMX lem2::natMX pREP81x_GFP</i>           | 1 | S8AB     |
| PSB1022 | <i>P (h-) leu1-32 ade6-210 ura4-D18 imr1L(NcoI)::ura4+ otr1R(SphI)::ade6+ mat1_m-cyhS smt0 rpl42::cyhR(sP56Q) cen1:hphMX lem2::natMX pREP81x_lem2_GFP</i>      | 1 | 5C S8ABC |
| PSB1024 | <i>P (h-) leu1-32 ade6-210 ura4-D18 imr1L(NcoI)::ura4+ otr1R(SphI)::ade6+ mat1_m-cyhS smt0 rpl42::cyhR(sP56Q) cen1:hphMX lem2::natMX pREP81x_lem2ΔN_GFP</i>    | 1 | 5C       |
| PSB1392 | <i>P (h-) leu1-32 ade6-210 ura4-D18 imr1L(NcoI)::ura4+ otr1R(SphI)::ade6+ mat1_m-cyhS smt0 rpl42::cyhR(sP56Q) cen1:hphMX lem2::natMX pREP81x_lem2ΔC_GFP</i>    | 1 | 5C       |
| PSB1023 | <i>P (h-) leu1-32 ade6-210 ura4-D18 imr1L(NcoI)::ura4+ otr1R(SphI)::ade6+ mat1_m-cyhS smt0 rpl42::cyhR(sP56Q) cen1:hphMX lem2::natMX pREP81x_lem2Nterm_GFP</i> | 1 | S8C      |
| PSB992  | <i>P (h-) leu1-32 ade6-210 ura4-D18 imr1L(NcoI)::ura4+ otr1R(SphI)::ade6+ mat1_m-cyhS smt0 rpl42::cyhR(sP56Q) cen1:hphMX lem2::natMX pREP81x_lem2Cterm_GFP</i> | 1 | S8C      |
| PSB1456 | <i>P (h+) leu1-32 ade6-M210 ura4-D18 his7-366? mis6:GFP:KanMX sad1:mCherry:hphMX pREP81x</i>                                                                   | 1 | 6AB      |
| PSB1457 | <i>P (h+) leu1-32 ade6-M210 ura4- his7-366? mis6:GFP:KanMX sad1:mCherry:hphMX lem2::natMX pREP81x</i>                                                          | 1 | 6AB      |
| PSB1458 | <i>P (h+) leu1-32 ade6-M210 ura4-D18 his7-366? mis6:GFP:KanMX sad1:mCherry:hphMX csil::natMX pREP81x</i>                                                       | 1 | 6AB      |

Table S1: Strains used in this study (cont.)

|         |                                                                                                                                                         |   |        |
|---------|---------------------------------------------------------------------------------------------------------------------------------------------------------|---|--------|
| PSB1459 | <i>P (h+) leu1-32 ade6-M210 ura4- his7-366? mis6:GFP:KanMX sad1:mCherry:hphMX lem2::natMX csi1::bleMX pREP81x</i>                                       | 1 | 6AB    |
| PSB1460 | <i>P (h+) leu1-32 ade6-M210 ura4- his7-366? mis6:GFP:KanMX sad1:mCherry:hphMX lem2::natMX csi1::bleMX pREP81x_lem2</i>                                  | 1 | 6AB    |
| PSB1462 | <i>P (h+) leu1-32 ade6-M210 ura4- his7-366? mis6:GFP:KanMX sad1:mCherry:hphMX lem2::natMX csi1::bleMX pREP81x_lem2ΔN</i>                                | 1 | 6AB    |
| PSB1464 | <i>P (h+) leu1-32 ade6-M210 ura4- his7-366? mis6:GFP:KanMX sad1:mCherry:hphMX lem2::natMX csi1::bleMX pREP81x-lem2ΔC</i>                                | 1 | 6AB    |
| PSB1232 | <i>P (h+) ade6- ura4- his7-366? taz1:GFP:KanMX cut11:mCherry:hphMX pREP81x</i>                                                                          | 1 | 6C     |
| PSB1234 | <i>P (h+) ade6- ura4- his7-366? taz1:GFP:KanMX cut11:mCherry:hphMX lem2::natMX pREP81x</i>                                                              | 1 | 6C     |
| PSB1235 | <i>P (h+) ade6- ura4- his7-366? taz1:GFP:KanMX cut11:mCherry:hphMX lem2::natMX pREP81x_lem2</i>                                                         | 1 | 6C     |
| PSB1236 | <i>P (h+) ade6- ura4- his7-366? taz1:GFP:KanMX cut11:mCherry:hphMX lem2::natMX pREP81x_lem2ΔN</i>                                                       | 1 | 6C     |
| PSB1237 | <i>P (h+) ade6- ura4- his7-366? taz1:GFP:KanMX cut11:mCherry:hphMX lem2::natMX pREP81x_lem2ΔC</i>                                                       | 1 | 6C     |
| PSB0889 | <i>P (h-) leu1-32 ade6-210 ura4-D18 imr1L(NcoI)::ura4+ otr1R(SphI)::ade6+ mat1_m-cyhS smt0 rpl42::cyhR(sP56Q) cen1:hphMX pREP81x</i>                    | 1 | 6D S1B |
| PSB0883 | <i>P (h-) leu1-32 ade6-210 ura4-D18 imr1L(NcoI)::ura4+ otr1R(SphI)::ade6+ mat1_m-cyhS smt0 rpl42::cyhR(sP56Q) cen1:hphMX lem2::natMX pREP81x</i>        | 1 | 6D S1B |
| PSB0884 | <i>P (h-) leu1-32 ade6-210 ura4-D18 imr1L(NcoI)::ura4+ otr1R(SphI)::ade6+ mat1_m-cyhS smt0 rpl42::cyhR(sP56Q) cen1:hphMX lem2::natMX pREP81x_lem2</i>   | 1 | 6D S1B |
| PSB0998 | <i>P (h-) leu1-32 ade6-210 ura4-D18 imr1L(NcoI)::ura4+ otr1R(SphI)::ade6+ mat1_m-cyhS smt0 rpl42::cyhR(sP56Q) cen1:hphMX lem2::natMX pREP81x_lem2ΔN</i> | 1 | 6D     |
| PSB0999 | <i>P (h-) leu1-32 ade6-210 ura4-D18 imr1L(NcoI)::ura4+ otr1R(SphI)::ade6+ mat1_m-cyhS smt0 rpl42::cyhR(sP56Q) cen1:hphMX lem2::natMX pREP81x_lem2ΔC</i> | 1 | 6D     |

Table S1: Strains used in this study (cont.)

|         |                                                                                                                                                             |   |       |
|---------|-------------------------------------------------------------------------------------------------------------------------------------------------------------|---|-------|
| PSB0885 | <i>P (h-) leu1-32 ade6-210 ura4-D18 imr1L(NcoI)::ura4+ otr1R(SphI)::ade6+ mat1_m-cyhS smt0 rpl42::cyhR(sP56Q) cen1:hphMX lem2::natMX pREP81x_lem2 Nterm</i> | 1 | 6D    |
| PSB1114 | <i>P (h-) leu1-32 ade6-210 ura4-D18 imr1L(NcoI)::ura4+ otr1R(SphI)::ade6+ mat1_m-cyhS smt0 rpl42::cyhR(sP56Q) cen1:hphMX lem2::natMX pREP81x_lem2 Cterm</i> | 1 | 6D    |
| PSB0886 | <i>P (h-) leu1-32 ade6-210 ura4-D18 imr1L(NcoI)::ura4+ otr1R(SphI)::ade6+ mat1_m-cyhS smt0 rpl42::cyhR(sP56Q) cen1:hphMX pREP41x</i>                        | 1 | S1B   |
| PSB0880 | <i>P (h-) leu1-32 ade6-210 ura4-D18 imr1L(NcoI)::ura4+ otr1R(SphI)::ade6+ mat1_m-cyhS smt0 rpl42::cyhR(sP56Q) cen1:hphMX lem2::natMX pREP41x</i>            | 1 | S1B   |
| PSB0881 | <i>P (h-) leu1-32 ade6-210 ura4-D18 imr1L(NcoI)::ura4+ otr1R(SphI)::ade6+ mat1_m-cyhS smt0 rpl42::cyhR(sP56Q) cen1:hphMX lem2::natMX pREP41x_lem2</i>       | 1 | S1B   |
| PSB1232 | <i>P (h+) ade6- ura4- his7-366? taz1:GFP:KanMX cut11:mCherry:hphMX pREP81x</i>                                                                              | 1 | 6E S9 |
| PSB1238 | <i>P (h+)ade6- ura4- his7-366? taz1:GFP:KanMX cut11:mCherry:hphMX lem2::natMX dsh1::bleMX pREP81x</i>                                                       | 1 | 6E S9 |
| PSB1239 | <i>P (h+) ade6- ura4- his7-366? taz1:GFP:KanMX cut11:mCherry:hphMX lem2::natMX dsh1::bleMX pREP81x_lem2</i>                                                 | 1 | 6E S9 |
| PSB1240 | <i>P (h+) ade6- ura4- his7-366? taz1:GFP:KanMX cut11:mCherry:hphMX lem2::natMX dsh1::bleMX pREP81x_lem2ΔN</i>                                               | 1 | 6E S9 |
| PSB1241 | <i>P (h+) ade6- ura4- his7-366? taz1:GFP:KanMX cut11:mCherry:hphMX lem2::natMX dsh1::bleMX pREP81x_lem2ΔC</i>                                               | 1 | 6E S9 |
| PSB1643 | <i>P (h+) ade6- ura4- his7-366? taz1:GFP:KanMX cut11:mCherry:hphMX lem2::natMX dsh1::bleMX pREP81x_lem2Nterm</i>                                            | 1 | 6E    |
| PSB1644 | <i>P (h+) ade6- ura4- his7-366? taz1:GFP:KanMX cut11:mCherry:hphMX lem2::natMX dsh1::bleMX pREP81x_lem2Cterm</i>                                            | 1 | 6E    |
| PM0818  | <i>P (h-) leu1-32 ade6-210 ura4-D18 smt0 clr1:CBP-FLAG:kanMX</i>                                                                                            | 3 | 7B    |
| PSB1472 | <i>P (h-) leu1-32 ade6-210 ura4-D18 smt0 clr1:CBP-FLAG:kanMX lem2::natMX</i>                                                                                | 1 | 7B    |
| PM0706  | <i>P (h-) leu1-32 ade6-210 ura4-D18 smt0 epe1:CBP-FLAG:kanMX</i>                                                                                            | 3 | 7B    |

Table S1: Strains used in this study (cont.)

|         |                                                                                                                   |   |         |
|---------|-------------------------------------------------------------------------------------------------------------------|---|---------|
| PSB1512 | <i>P (h-) leu1-32 ade6-210 ura4-D18 smt0 epe1::CBP-FLAG::kanMX lem2::natMX</i>                                    | 1 | 7B      |
| PM0077  | <i>P (h+) leu1-32 ade6-210 ura4-DS/E imr1L(NcoI)::ura4+ otr1R(SphI)::ade6+ clr1::kanMX</i>                        | 3 | 7C S10A |
| PSB1470 | <i>P (h+) leu1-32 ade6-210 ura4-DS/E imr1L(NcoI)::ura4+ otr1R(SphI)::ade6+ clr1::kanMX lem2::natMX</i>            | 1 | 7C S10A |
| PSB1480 | <i>P (h+) leu1-32 ade6-210 ura4-DS/E imr1L(NcoI)::ura4+ otr1R(SphI)::ade6+ clr3::kanMX</i>                        | 1 | 7C S10A |
| PSB1482 | <i>P (h+) leu1-32 ade6-210 ura4-DS/E imr1L(NcoI)::ura4+ otr1R(SphI)::ade6+ cen1:hphMX lem2::natMX clr3::kanMX</i> | 1 | 7C S10A |
| PSB1647 | <i>P (h+) leu1-32 ade6-210 ura4-DS/E imr1L(NcoI)::ura4+ otr1R(SphI)::ade6+ nur1::natMX</i>                        | 1 | 7C S10A |
| PSB1645 | <i>P (h+) leu1-32 ade6-210 ura4-DS/E imr1L(NcoI)::ura4+ otr1R(SphI)::ade6+ clr1::kanMX nur1::natMX</i>            | 1 | 7C S10A |
| PSB1508 | <i>P (h+) leu1-32 ade6-210 ura4-DS/E imr1L(NcoI)::ura4+ otr1R(SphI)::ade6+ sir2::kanMX</i>                        | 1 | 7C      |
| PSB1510 | <i>P (h+) leu1-32 ade6-210 ura4-DS/E imr1L(NcoI)::ura4+ otr1R(SphI)::ade6+ cen1:hphMX lem2::natMX sir2::kanMX</i> | 1 | 7C      |
| PSB1666 | <i>P (h+) leu1-32 ade6-210 ura4-DS/E imr1L(NcoI)::ura4+ otr1R(SphI)::ade6+ ckb1::kanMX</i>                        | 1 | 7C S10A |
| PSB1668 | <i>P (h+) leu1-32 ade6-210 ura4-DS/E imr1L(NcoI)::ura4+ otr1R(SphI)::ade6+ cen1:hphMX lem2::natMX ckb1::kanMX</i> | 1 | 7C S10A |
| PM0512  | <i>P (h+) leu1-32 ade6-210 ura4-DS/E imr1L(NcoI)::ura4+ otr1R(SphI)::ade6+ epe1::kanMX</i>                        | 3 | 7D S10B |
| PSB1476 | <i>P (h+) leu1-32 ade6-210 ura4-DS/E imr1L(NcoI)::ura4+ otr1R(SphI)::ade6+ epe1::kanMX lem2::natMX</i>            | 1 | 7D S10B |



Table S1: Strains used in this study (cont.)

|         |                                                                                                                   |   |         |
|---------|-------------------------------------------------------------------------------------------------------------------|---|---------|
| PSB1649 | <i>P (h+) leu1-32 ade6-210 ura4-DS/E imr1L(NcoI)::ura4+ otr1R(SphI)::ade6+ epe1::kanMX nur1::natMX</i>            | 1 | 7D      |
| PSB1514 | <i>P (h+) leu1-32 ade6-210 ura4-DS/E imr1L(NcoI)::ura4+ otr1R(SphI)::ade6+ mst2::kanMX</i>                        | 1 | 7D S10B |
| PSB1516 | <i>P (h+) leu1-32 ade6-210 ura4-DS/E imr1L(NcoI)::ura4+ otr1R(SphI)::ade6+ cen1:hphMX lem2::natMX mst2::kanMX</i> | 1 | 7D S10B |

1=This study; 2=Ekwall et al. 1999; 3=Braun et al. 2010; 4=Karl Ekwall; 5=Bioneer haploid deletion library; \*=derived from SS2352 strain (Shelley Sazer)

**Table S2: Plasmids used in this study**

| <b>Bacterial host strain</b> | <b>Plasmid</b>         | <b>Insert</b>     | <b>Markers</b>               | <b>Derived from</b> |
|------------------------------|------------------------|-------------------|------------------------------|---------------------|
| ESB350                       | pREP41x_Lem2           | <i>Lem2</i>       | <i>ampR leu2<sup>+</sup></i> | pREP41x             |
| ESB363                       | pREP41x_Lem2ΔN         | <i>Lem2ΔN</i>     | <i>ampR leu2<sup>+</sup></i> | pREP41x             |
| ESB364                       | pREP41x_Lem2ΔC         | <i>Lem2ΔC</i>     | <i>ampR leu2<sup>+</sup></i> | pREP41x             |
| ESB371                       | pREP41x_Lem2 Cterm     | <i>Lem2 Cterm</i> | <i>ampR leu2<sup>+</sup></i> | pREP41x             |
| ESB351                       | pREP41x_Lem2 Nterm     | <i>Lem2 Nterm</i> | <i>ampR leu2<sup>+</sup></i> | pREP41x             |
| ESB353                       | pREP81x_Lem2           | <i>Lem2</i>       | <i>ampR leu2<sup>+</sup></i> | pREP81x             |
| ESB365                       | pREP81x_Lem2ΔN         | <i>Lem2ΔN</i>     | <i>ampR leu2<sup>+</sup></i> | pREP81x             |
| ESB366                       | pREP81x_Lem2ΔC         | <i>Lem2ΔC</i>     | <i>ampR leu2<sup>+</sup></i> | pREP81x             |
| ESB372                       | pREP81x_Lem2 Cterm     | <i>Lem2 Cterm</i> | <i>ampR leu2<sup>+</sup></i> | pREP81x             |
| ESB355                       | pREP81x_Lem2 Nterm     | <i>Lem2 Nterm</i> | <i>ampR leu2<sup>+</sup></i> | pREP81x             |
| ESB382                       | pREP81x_Lem2_GFP       | <i>Lem2</i>       | <i>ampR leu2<sup>+</sup></i> | pREP81x_GFP_Ctag    |
| ESB379                       | pREP81x_Lem2ΔN_GFP     | <i>Lem2ΔN</i>     | <i>ampR leu2<sup>+</sup></i> | pREP81x_GFP_Ctag    |
| ESB380                       | pREP81x_Lem2ΔC_GFP     | <i>Lem2ΔC</i>     | <i>ampR leu2<sup>+</sup></i> | pREP81x_GFP_Ctag    |
| ESB375                       | pREP81x_Lem2 Cterm_GFP | <i>Lem2 Cterm</i> | <i>ampR leu2<sup>+</sup></i> | pREP81x_GFP_Ctag    |
| ESB384                       | pREP81x_Lem2 Nterm_GFP | <i>Lem2 Nterm</i> | <i>ampR leu2<sup>+</sup></i> | pREP81x_GFP_Ctag    |

**Table S3: Primer sets used for RT-qPCR and ChIP analysis**

| <b>oligo name</b>          | <b>FOR oligo</b>            | <b>REV oligo</b>            | <b>locus</b>                                        | <b>reference</b>     |
|----------------------------|-----------------------------|-----------------------------|-----------------------------------------------------|----------------------|
| P638/639                   | AAC CCT CAG CTT TGG GTC TT  | TTT GCA TAC GAT CGG CAA TA  | <i>act1</i> <sup>+</sup>                            | Braun et al., 2010   |
| P581/582                   | CAG CAA TAT CGT ACT CCT GAA | ATG CTG AGA AAG TCT TTG CTG | <i>ura4</i> <sup>+</sup>                            | Braun et al., 2010   |
| P_F'cen-dh-<br>mb263/mb264 | TGAATCGTGTCACCTCAACCC       | CGAAACTTTCAGATCTCGCC        | <i>cen-dh</i>                                       | Buehler et al., 2007 |
| P059/060                   | TGC TCT GAC TTG GCT TGT CTT | CCC TAA CTT GGA AAG GCA CA  | <i>cen-dg</i>                                       | Braun et al., 2010   |
| SG1573/1574                | CGAGACCCCCTAATGCTTTT        | CCAGGGTACATTTTCTGATGTTG     | <i>mat3M</i>                                        | This study           |
| P_F'tlh1-<br>mb274/276     | ATGGTCGTCGCTTCAGAAATTGC     | CTCCTTGAAGAATTGCAAGCCTC     | <i>tlh1</i> <sup>+</sup> / <i>tlh2</i> <sup>+</sup> | Buehler et al., 2007 |
| SG1953/1954                | TCGCCGGTAACAAAAGGATCA       | GCATTAGACAACTCGTTCGATC      | <i>cnt1</i>                                         | This study           |
| SG1800/1802                | TGTCAGCTACGCAGTTTGG         | AACCTCGTTCCTCAGTTCTGT       | <i>LTR-Prox</i>                                     | This Study           |
| SG1804/1806                | CCGTCTATATACATTGATATCCGTTG  | CTGCGGTGAGTTTACTTGC         | <i>LTR-Dist</i>                                     | This Study           |

**Table S4: Primer sets used for tiling arrays RT-qPCRs**

| <b>oligo name</b> | <b>FOR oligo</b>         | <b>REV oligo</b>          | <b>Chr</b>  | <b>Chr pos.[bp]</b> |
|-------------------|--------------------------|---------------------------|-------------|---------------------|
| IRC-L4            | TCGTTAGCATTGGCTTTGA      | TGCCATATCGTCTCCGTCT       | <i>Chr1</i> | 3751165             |
| IRC-L2            | AACCCAAGCAGATAGACTGAAA   | TAGGACCGAACTGCCAAAAC      | <i>Chr1</i> | 3752671             |
| cen01             | GCAAAGATCGAACGAGTTGTC    | TGAAATTCATAAACGGGCTA      | <i>Chr1</i> | 3771275             |
| cen06             | TTACCAAATTTGTCAAACGTAAAT | TGCGTTTTCTTAGTAAAAACCTGAT | <i>Chr1</i> | 3773338             |
| cen07             | TGAGGTTTTTCGTTCTTAGGG    | GGCAATGTCACAAAGTTTCAA     | <i>Chr1</i> | 3773701             |
| cen08             | TGGACACCACTCTTGCCATA     | TTGCGCATCAAGTATTTTGC      | <i>Chr1</i> | 3774123             |
| cen10             | GGCATTTTGTAAGCGGAAAT     | TGCTTGTTTAGTGTTGAACGAA    | <i>Chr1</i> | 3774855             |
| cen12             | CAGCTTCTGTACTCACTCACTCA  | TCGTCTTGCCTAGCGAAAT       | <i>Chr1</i> | 3775539             |
| cen16             | ATCACGCTTCCTTAGCATGG     | TCATTCGTTGTACCAACTGCT     | <i>Chr1</i> | 3777292             |
| cen17             | ACATTGCTCCGGTGATTTTC     | GGCGTGAATATTGATGTTTTGA    | <i>Chr1</i> | 3777698             |
| cen18             | AACCACCACCATGCTCTTTT     | TCGCAACGATTTGAACTGTC      | <i>Chr1</i> | 3778113             |
| cen19             | TGCGGTCATTTAAAGGCATA     | CTGTTGTTGAGTGCTGTGGA      | <i>Chr1</i> | 3778877             |
| cen20             | CCCATGATGTCGTTGGTAAA     | CATGGAGAGCGTATGTTGAAA     | <i>Chr1</i> | 3779340             |
| cen21             | ATTCGCTTTGGCAAAACAT      | GTTCCCGCCAGTAGATG         | <i>Chr1</i> | 3779670             |
| cen22             | TGGAACCCCTAACTTGAAAA     | TGCTCTGACTTGGCTTGCTT      | <i>Chr1</i> | 3780086             |
| cen24             | AGAAAATTTCACAACTCCGTTGAT | AGAGTTGCCGCAATTGAAAC      | <i>Chr1</i> | 3780950             |

Table S4: Oligonucleotides used in this study (cont.)

|                  |                            |                         |             |         |
|------------------|----------------------------|-------------------------|-------------|---------|
| cen25            | ACAACATGCAATACCGATTGT      | TCGTTATTGAAACACGAATAGGA | <i>Chr1</i> | 3781261 |
| cen26            | GCACCGTTTTTCCAAATGTC       | AACCATTTCGCATCCATTTTT   | <i>Chr1</i> | 3781720 |
| cen28            | TGAGGTTTCATGATGGGTTCA      | TTCGGTCTTTGCAGGACTCT    | <i>Chr1</i> | 3782516 |
| cen29            | CGAAGTATGACCCGAATTGC       | CCACGGAAAAACAAATTACCG   | <i>Chr1</i> | 3782972 |
| cen30            | CGAAAATTGTGTTGTGCCAGT      | CATTCATCTTGC GTGTCTGC   | <i>Chr1</i> | 3783342 |
| cen31            | ATGCTCCGTTGCTTATCTCG       | TCCTCACATTCGACATGACTG   | <i>Chr1</i> | 3783755 |
| cen33            | TTTGCATTCTTATCACTTGGATG    | TGCTACGTACGCCAGTTGC     | <i>Chr1</i> | 3784450 |
| cen34            | GTTTGTTTTGGGGAGACGAA       | CGATCAAATCGGTCAGTACG    | <i>Chr1</i> | 3784990 |
| cen35            | CCTACCGAACGTATGATTAGCA     | TGGGATCGCAATTTTTGATT    | <i>Chr1</i> | 3785332 |
| cen36            | CGATCGATTTCTCTTGGTTTTTC    | TCGCGAACATCAGCATTACT    | <i>Chr1</i> | 3785697 |
| cen37            | CCAAAGCAAATAGTCTAATGATCAAA | CACGGCGATAAGAAATGGA     | <i>Chr1</i> | 3786158 |
| cen38            | CCACCAGACCATTACAAGCA       | CTCGCCTATTTACCGATCCA    | <i>Chr1</i> | 3786575 |
| cen39            | CGTTGAATGTTGTGCTTTCA       | AATGACAAAAGGTGCCGAATC   | <i>Chr1</i> | 3786950 |
| cen40            | CATCTCGACTCGCTTGATGA       | TGGGCATTCACGAAACATAG    | <i>Chr1</i> | 3787338 |
| cen41            | GTCCTGAATCTTGGCAAACAG      | TACAAGGACTAAGCCCAAGCA   | <i>Chr1</i> | 3788114 |
| cen42            | GAAATGGGCAACAAGTCGAT       | GTTGCGCAAACGAAGTTATG    | <i>Chr1</i> | 3788463 |
| cen43            | TCCACTTGGATGACAGAATCC      | CAACGCATCTACCTCAGCAG    | <i>Chr1</i> | 3788848 |
| IRC-<br>L/R_alt1 | TTGTCACGGTTTGGTTTTCA       | TGTC AAGGGAAAAACCGAGA   | <i>Chr2</i> | 3789470 |

Table S4: Oligonucleotides used in this study (cont.)

|              |                             |                        |             |         |
|--------------|-----------------------------|------------------------|-------------|---------|
| ICR-L/R_alt3 | TTGGCAAACCTCAAGGGAGT        | CCCGCAAAACCATAAAATGT   | <i>Chr4</i> | 3789888 |
| IRC-L/R1     | TGCTGAATGTAACCAACATCA       | GCCTCAATTGCCTATTAGTGCT | <i>Chr1</i> | 3790113 |
| IRC-R2       | GCAGTGTTTACCAACAAGCGTA      | AGAGAATCGCAAACGCATCT   | <i>Chr1</i> | 3790516 |
| IRC-R3       | TGTGTGTCAAGCAAGAAAGC        | TTCATGTGCAGAATAAGCAGTG | <i>Chr1</i> | 3790961 |
| TEL2L-1      | AAATTGACAGGGTCCTTGCT        | TGGTTAATTGTTGAGCCGGTA  | <i>Chr2</i> | 211     |
| TEL2L-2      | TGGTCCAAGACTTCAAAAACG       | GTTATGGTGCTGCCATGTTG   | <i>Chr2</i> | 527     |
| TEL2L-3      | TCGAAGAGTATAACTTATTTGGGTTG  | CAACACCTTCAAGGAAAGGAA  | <i>Chr2</i> | 1113    |
| TEL2L-4      | TGTCAGCTACGCAGTTTTGG        | AACCTCGTTCCTCAGTTCTGT  | <i>Chr2</i> | 1396    |
| TEL2L-5      | AATACGTTGTAGAAGTAGAGCATTACA | CCAATAATTGCGGAAGGCTA   | <i>Chr2</i> | 2887    |
| TEL2L-6      | CGTTGAATAACACCATACGTCAA     | GCTTATTGCTGAACCTCGTTCT | <i>Chr2</i> | 4970    |
| TEL2L-7      | TGCAGAGTTTGCGGTA CTG        | CACAGACGTCTCCTGGTGTC   | <i>Chr2</i> | 6103    |
| TEL2L-8      | TTGAAACAATGCACGTCTGT        | ATCACCAATGATCACCGACA   | <i>Chr2</i> | 8827    |
| TEL2L-9      | GCAATACGCTATTTTCGTTATGAGA   | TCAGCCAAAATTATTGTGCAAG | <i>Chr2</i> | 15238   |
| TEL2L-10     | GGCAACAGTTGGTTCTGACA        | GACGCACCTTTAGTGCATGA   | <i>Chr2</i> | 20417   |
| TEL2L-11     | GGTTGAAGAGGGTGCAGGTA        | TCTCAATGCCATCCATTCAA   | <i>Chr2</i> | 25471   |
| TEL2L-12     | TGGACCAGCTTTGTGACATT        | ACCACGCTTTCCTTTGAGAA   | <i>Chr2</i> | 36499   |
| TEL2L-13     | GCAAAACAACGCAACTTGA         | AAGACGAGGCTCCC GTTTAT  | <i>Chr2</i> | 38690   |
| TEL2L-14     | CGCTTGAAAGCACCAGAGA         | AAATTACTCGCCGTCAGTGC   | <i>Chr2</i> | 44889   |

Table S4: Oligonucleotides used in this study (cont.)

|          |                            |                          |             |       |
|----------|----------------------------|--------------------------|-------------|-------|
| TEL2L-15 | TGTGATTGCGTTTTCTCTG        | GTGGCCGCACTAAAAAGAAA     | <i>Chr2</i> | 47552 |
| TEL2L-16 | GGACTGCGGAAGGATATTCA       | AGAATGCCAAACATGCGTTA     | <i>Chr2</i> | 54548 |
| TEL2L-17 | ATCCAAAACGGATTTTGTGC       | ATGACCCCATGCAGTAGCTC     | <i>Chr2</i> | 55969 |
| TEL2L-18 | TCTTCTGCGATCTGCACAC        | CGGATAGTTACCCATCATTATCAA | <i>Chr2</i> | 57305 |
| TEL2L-19 | GTGAGGAGCACAGTTCAGCA       | TCAGCACTACGCCGTATTACAC   | <i>Chr2</i> | 57750 |
| TEL2L-20 | GTCAGGTGCTCCTTGCAGAT       | CCGTAAAACGGTAAATACAGCA   | <i>Chr2</i> | 58367 |
| TEL2L-21 | CCACTGAGACGAGGATTATACG     | TCGTTGCTCTCTCAGCAAAA     | <i>Chr2</i> | 60773 |
| TEL2L-22 | TCGCTCTCCTTTCTTCACC        | TGAAGATTTCAGCTGGAAGAGG   | <i>Chr2</i> | 61760 |
| TEL2L-23 | CCGTCTATATACATTGATATCCGTTG | CTGCGGTGAGTTTTACTTGC     | <i>Chr2</i> | 63393 |
| TEL2L-24 | CGCTGTCGAGATTACCGAAT       | TTTCATAACTGGCGTAAGGGTTA  | <i>Chr2</i> | 64624 |
| TEL1L-1  | TTGCCTTTCTAGCCCATGAC       | TGCCCCGTACGCTTATCTAC     | <i>Chr1</i> | 291   |
| TEL1L-2  | TCCTTCAGAAATGGCTTGCT       | GCATGTGTGTTATCCCGTTG     | <i>Chr1</i> | 9096  |
| TEL1L-3  | TAATGAGTTGCCCCGGGTAT       | CCGAATGGCAAGATGGTAAT     | <i>Chr1</i> | 13052 |
| TEL1L-4  | TGACAGCCAAAAGCCCTACT       | GTGGCAAGGCAGACTCATT      | <i>Chr1</i> | 16179 |
| TEL1L-5  | ACTGCTACTCCCTGGCTGTG       | GGCGAATGTGTATGTTGTGC     | <i>Chr1</i> | 18578 |
| TEL1L-6  | AGACGTCTCCTGATGTCACAA      | TTATAGCATGGGTCGGTGTG     | <i>Chr1</i> | 22469 |
| TEL1L-7  | CACAGACGTCTCCTGGTGTC       | TGCAGAGTTTGCGGTACTTG     | <i>Chr1</i> | 29603 |
| TEL1L-8  | ATAGCCCTGGTGCAGATCAC       | TTTACATTTGGATGCGTCGT     | <i>Chr1</i> | 32718 |

Table S4: Oligonucleotides used in this study (cont.)

|             |                            |                            |             |       |
|-------------|----------------------------|----------------------------|-------------|-------|
| TEL1L-9     | TTTTGAGGGGTCAAATGGTC       | TTACTCAGCCAGTGCCTCAG       | <i>Chr1</i> | 34891 |
| TEL1L-10    | TTGTAGAAGCCAATGGCAGA       | GTGAAATTTGGGGGCCTATT       | <i>Chr1</i> | 40098 |
| TEL1L-11    | AAAGCAATTTTCGCATTTTGG      | CCTCCGATCGATGATACGTT       | <i>Chr1</i> | 44906 |
| Tel1L-5a_F  | TGGAATAAAGTGTGCTATTGAA     | AGAACCGTTACTTTTCATTCAAAC   | <i>Chr1</i> | 19429 |
| Tel1L-5b_F  | CGTTAATTAGAAGAGAAAATGTTTGG | TTTTCTATCAAAAATAGCGAAACTTG | <i>Chr1</i> | 20303 |
| Tel1L-5c_F  | CGGTGACCGATAACCATTAGA      | CGATACGTATAATAGCGGTGA      | <i>Chr1</i> | 21287 |
| Tel1L-5d_F  | CATGGGTCCGGTGTGGTTATAG     | ATCTTGTAGACCAGCCAATG       | <i>Chr1</i> | 22283 |
| Tel1L-5e_F  | GGGTTTCGAACGAACTGTAAA      | CGAATTAGCAGGAATTAGCTTT     | <i>Chr1</i> | 23226 |
| Tel1L-5f_F  | TGCCTATCTGAACTCAGACGAA     | CAACTGAACCTCCTAACTCGTTT    | <i>Chr1</i> | 24307 |
| Tel1L-5g_F  | CGGCGTTGCTAGTTCCATAA       | CCAAATAACAATTCAAAAATCAAA   | <i>Chr1</i> | 25284 |
| Tel1L-5h_F  | CGCTTTC AATGGGTATTTTTG     | TACTCGTTGTGCATCACCAT       | <i>Chr1</i> | 26296 |
| Tel1L-5i_F  | CTACGCATTCCAGCAGAACC       | CCACGTTAGCAGCCGACTAT       | <i>Chr1</i> | 27352 |
| Tel1L-12a_F | AATCTGAAATGGGAGCGTGT       | TGGCGTTTTCTTTTTCGTGT       | <i>Chr1</i> | 48678 |
| TEL1L-13_F  | ATAGTGGCCGGGGGATTTAT       | GGCCCAAATATTAATCCAGTGA     | <i>Chr1</i> | 52262 |
| TEL1L-14_F  | AATCTATGGGAAGGGGCACT       | ACTTTACCGGTTGGAACAGC       | <i>Chr1</i> | 57121 |
| TEL1L-15_F  | AAACCAACGGTCAGTTACTTGTT    | CCTTAAGCGATTTCCCTTTG       | <i>Chr1</i> | 62159 |
| TEL1L-16_F  | CGGTATCTGGACCACTTGC        | GGTGTGCGAGAAGCGTAAAGG      | <i>Chr1</i> | 67082 |
| TEL1L-17_F  | CCGATTTTATGAAGTTCAGCAC     | GCAAATTTTTTCGCGTTTTTC      | <i>Chr1</i> | 72123 |



Table S4: Oligonucleotides used in this study (cont.)

|            |                        |                        |             |       |
|------------|------------------------|------------------------|-------------|-------|
| TEL1L-18_F | CCAATCGTTCGTTTCTCAGG   | TTTACCATTCTGCCGATCTGT  | <i>Chr1</i> | 77101 |
| TEL1L-19_F | CTGAGGGGTACCTTTCGTCA   | AGCGCACTTTCAAACGGTAA   | <i>Chr1</i> | 82120 |
| TEL1L-20_F | TGCTTTACCCCTCTGATTTTT  | GCACAGAACTCGAAATGCAG   | <i>Chr1</i> | 87101 |
| TEL1L-21_F | AAGGCATTGAAAGTACCGCTAT | CAGTAATCGTCGCGTCTACCT  | <i>Chr1</i> | 92096 |
| TEL1L-22_F | CGTAAGTGGTCGAAAAACAC   | CAATCCGATCATTTATGCACTT | <i>Chr1</i> | 97194 |
